# Supplementary material for: MIPV-NWP-PINN V1.0: Development of a Multi-scale Photovoltaic Power Forecasting Framework Integrating Numerical Weather Prediction with Physics-Informed Neural Networks
Source: Copernicus journal article supplement (doi:10.5194/egusphere-2025-4439), 2025-10-28
Supplement: Supplementary file 1 [file Table S1 .docx]

Table S1 Data Collection Station Equipment Parameters

| **Device Name** | **Range** | **Measurement Accuracy** |
| --- | --- | --- |
| PV Module Temperature Probe | -40-135℃ | ±0.2℃ (-40-70℃) |
| ±0.5℃ (71-105℃) |
| ±1℃ (72-135℃) |
| Ambient Temperature Probe | -80-60℃ | 0.266℃ |
| Irradiance Sensor | 400-1000nm | 0.2kW-2mV-1 |
| Anemometer | 0-65m/s | 0.01 or 0.001m/s |
| 0-359.9° | 1 or 0.1° |
