# Supplementary material for: MIPV-NWP-PINN V1.0: Development of a Multi-scale Photovoltaic Power Forecasting Framework Integrating Numerical Weather Prediction with Physics-Informed Neural Networks
Source: Copernicus journal article supplement (doi:10.5194/egusphere-2025-4439), 2025-10-28
Supplement: Supplementary file 3 [file Table S2.docx]

Table S2 Physics parameters

| Parameter | Scheme | Reference |
| --- | --- | --- |
| Shortwave Radiation | Dudhia | Dudhia (1989) |
| Longwave Radiation | RRTMG | Iacono et al. (2008) |
| Cumulus Scheme | Kaine-Fritsch | Kain and Fritsch (1993) |
| Land Surface Model | Noah | Kain (2004) |
| Planetary Boundary Layer | Yonsei University | Hong and Pan (1996) |
| Microphysics Scheme | Thompson graupel | Thompson and Eidhammer (2014) |

Reference

Dudhia, J.: Numerical Study of Convection Observed during the Winter Monsoon Experiment Using a Mesoscale Two-Dimensional Model, Journal of Atmospheric Sciences, 46, 3077-3107, <https://doi.org/10.1175/1520-0469(1989)046><3077:NSOCOD>2.0.CO;2, 1989.

Hong, S.-Y. and Pan, H.-L.: Nonlocal Boundary Layer Vertical Diffusion in a Medium-Range Forecast Model, Monthly Weather Review, 124, 2322-2339, <https://doi.org/10.1175/1520-0493(1996)124><2322:NBLVDI>2.0.CO;2, 1996.

Iacono, M. J., Delamere, J. S., Mlawer, E. J., Shephard, M. W., Clough, S. A., and Collins, W. D.: Radiative forcing by long-lived greenhouse gases: Calculations with the AER radiative transfer models, Journal of Geophysical Research: Atmospheres, 113, <https://doi.org/10.1029/2008JD009944>, 2008.

Kain, J. S.: The Kain–Fritsch Convective Parameterization: An Update, Journal of Applied Meteorology, 43, 170-181, <https://doi.org/10.1175/1520-0450(2004)043><0170:TKCPAU>2.0.CO;2, 2004.

Kain, J. S. and Fritsch, J. M.: Convective Parameterization for Mesoscale Models: The Kain-Fritsch Scheme, in: The Representation of Cumulus Convection in Numerical Models, edited by: Emanuel, K. A., and Raymond, D. J., American Meteorological Society, Boston, MA, 165-170, 10.1007/978-1-935704-13-3_16, 1993.

Thompson, G. and Eidhammer, T.: A Study of Aerosol Impacts on Clouds and Precipitation Development in a Large Winter Cyclone, Journal of the Atmospheric Sciences, 71, 3636-3658, <https://doi.org/10.1175/JAS-D-13-0305.1>, 2014.
